1 **Do closely related species interact with similar partners?**

2 **Testing for phylogenetic signal in bipartite interaction networks**

3

4 Running title: Measuring phylogenetic signal in interactions

5

6 Benoît Perez-Lamarque <sup>1,2</sup>, Odile Maliet <sup>1</sup>, Benoît Pichon <sup>3,1</sup>, Marc-André Selosse <sup>2,4</sup>,

7 Florent Martos <sup>2</sup>, and Hélène Morlon <sup>1</sup>

8

9 <sup>1</sup> *Institut de biologie de l'École normale supérieure (IBENS), École normale supérieure, CNRS,*  
10 *INSERM, Université PSL, 46 rue d'Ulm, 75 005 Paris, France*

11 <sup>2</sup> *Institut de Systématique, Évolution, Biodiversité (ISYEB), Muséum national d'histoire*  
12 *naturelle, CNRS, Sorbonne Université, EPHE, UA, CP39, 57 rue Cuvier 75 005 Paris, France*

13 <sup>3</sup> *Institut d'écologie et des sciences de l'environnement (iEES), Sorbonne Université, CNRS,*  
14 *UPEC, CNRS, IRD, INRA, 75 005 Paris, France*

15 <sup>4</sup> *Department of Plant Taxonomy and Nature Conservation, University of Gdansk, Wita*  
16 *Stwosza 59, 80-308 Gdansk, Poland*

17

18 Corresponding author: Benoît Perez-Lamarque (benoit.perez@ens.psl.eu)

19

20 Supplementary data: [https://github.com/BPerezLamarque/Phylosignal\\_network/](https://github.com/BPerezLamarque/Phylosignal_network/blob/master/Supplementary_figures_phylo_signal_network.pdf)

21 [blob/master/Supplementary\\_figures\\_phylo\\_signal\\_network.pdf](https://github.com/BPerezLamarque/Phylosignal_network/blob/master/Supplementary_figures_phylo_signal_network.pdf)

22

23

## 24 **Abstract**

25 Whether interactions between species are conserved on evolutionary time-scales has  
26 spurred the development of both correlative and model-based approaches for testing  
27 phylogenetic signal in interspecific interactions: do closely related species interact with  
28 similar partners? Here we use simulations to test the statistical performances of the  
29 two approaches that are the most widely used in the field: Mantel tests and the  
30 Phylogenetic Bipartite Linear Model (PBLM). Mantel tests investigate the correlation  
31 between phylogenetic distances and dissimilarities in sets of interacting partners,  
32 while PBLM is a model-based approach that relies on strong assumptions on how  
33 interactions evolve. We find that PBLM often detects phylogenetic signal when it  
34 should not. Simple Mantel tests instead have low type-I error rates and moderate  
35 statistical power; however, they often artifactually detect that closely related species  
36 interact with dissimilar partners. Partial Mantel tests, which are used to partial out the  
37 phylogenetic signal in the number of partners, actually fail at correcting for this  
38 confounding effect, and we instead propose the sequential use of simple Mantel tests.  
39 We also explore the ability of simple Mantel tests to analyze clade-specific  
40 phylogenetic signal. We provide general guidelines and an application on an  
41 interaction network between orchids and mycorrhizal fungi.

42

43 **Keywords:** ecological network, phylogenetic signal, Mantel tests, clade-specific signal,  
44 species interactions, mycorrhizal symbiosis.

## 45 Introduction

46

47 Species in ecological communities engage in numerous types of interspecific  
48 interactions, such as pollination, mycorrhizal symbioses, herbivory, and parasitism  
49 (Bascompte et al. 2003; Fontaine et al. 2011; Martos et al. 2012; Bascompte and Jordano  
50 2013), which are often summarized using bipartite interaction networks (Bascompte &  
51 Jordano 2013; Fig. 1). Understanding the processes that shape these interaction  
52 networks, including the role of evolutionary history, is a major focus of ecology and  
53 evolution (Rezende et al. 2007; Vázquez et al. 2009; Krasnov et al. 2012; Elias et al. 2013;  
54 Rohr and Bascompte 2014). One way to assess the role of evolutionary history in  
55 shaping contemporary interactions is to test for phylogenetic signal in species  
56 interactions, *i.e.* whether closely related species interact with similar sets of partners  
57 (Peralta 2016).

58

59 Testing for phylogenetic signal in a unidimensional trait (*i.e.* whether a trait is  
60 phylogenetically conserved) for a given clade is mainstream (Felsenstein 1985;  
61 Blomberg et al. 2003; Münkemüller et al. 2012). One approach (the ‘correlative’  
62 approach) is to perform a Mantel test between phylogenetic and trait distances (Mantel  
63 1967); another approach (the ‘model-based’ approach) relies on trait evolution models  
64 such as Pagel’s  $\lambda$  (Pagel 1999) or Blomberg’s  $K$  (Blomberg et al. 2003). The model-based  
65 approach has a higher ability to detect an existing phylogenetic signal (power) and a  
66 lower propensity to infer a phylogenetic signal when it should not (type-I error;  
67 Harmon & Glor 2010): The correlative approach should therefore only be used when  
68 the model-based approach is not applicable, *e.g.* if the ‘trait’ data is expressed in terms  
69 of pairwise distances.

70

71 Testing for phylogenetic signal in species interactions falls in the category of  
72 cases where the ‘trait’ data are pairwise distances, here the between-species  
73 dissimilarity in sets of interacting species. Simple Mantel tests have therefore been

74 widely used in this context (*e.g.* Cattin *et al.* 2004; Rezende *et al.* 2007; Elias *et al.* 2013;  
75 Fontaine & Thébault 2015). Partial Mantel tests have also been used to test whether the  
76 phylogenetic signal reflects more the identity of the interacting partners than their  
77 number, *i.e.* the degree, as similarity in the number of partners can increase the value  
78 of similarity metrics (“phylogenetic signal in the number of partners”; Rezende *et al.*  
79 2007; Jacquemyn *et al.* 2011; Aizen *et al.* 2016). Mantel tests, that are easy and fast to  
80 run and that do not rely on strong hypotheses, have therefore been vastly used to test  
81 for phylogenetic signal in species interactions in empirical networks (Cattin *et al.* 2004;  
82 Rezende *et al.* 2007; Jacquemyn *et al.* 2011; Elias *et al.* 2013; Fontaine and Thébault  
83 2015). Besides these correlative approaches, several model-based approaches have  
84 been developed (Ives and Godfray 2006; Rafferty and Ives 2013; Hadfield *et al.* 2014;  
85 Li *et al.* 2020). The first of this model, the Phylogenetic Bipartite Linear Model (PBLM,  
86 Ives & Godfray 2006) has been widely used to test for phylogenetic signal in species  
87 interactions in a variety of networks, *e.g.* in host-parasite, plant-fungus, and pollination  
88 networks (Ives and Godfray 2006; Martos *et al.* 2012; Martín González *et al.* 2015; Xing  
89 *et al.* 2020). In short, PBLM assumes that interaction strengths between species from  
90 the two guilds are determined by (unobserved) traits that evolve on the two  
91 phylogenies each following a simplified Ornstein-Uhlenbeck process (Blomberg *et al.*  
92 2003). PBLM performs a phylogenetic regression to infer the Ornstein-Uhlenbeck  
93 parameters, which are then interpreted in terms of phylogenetic signal (Ives &  
94 Godfray 2006). Other models have been developed more recently (Rafferty and Ives  
95 2013; Hadfield *et al.* 2014; Li *et al.* 2020), including the phylogenetic generalized linear  
96 mixed model (PGLMM; Rafferty and Ives 2013) that uses linear mixed models to infer  
97 phylogenetic signals in both the number of partners and species interactions. Yet, the  
98 higher computational requirements of these methods have prevented their  
99 widespread use on empirical networks. PBLM thus remains the method frequently  
100 used in empirical studies (*e.g.* Xing *et al.* 2020; Corro *et al.* 2021).

101

102 Mantel tests and PBLM sometimes provide contradictory conclusions on  
103 empirical data and this is difficult to interpret because the statistical performances of  
104 the two approaches have never been compared (Peralta 2016). Importantly, the  
105 statistical performances of PBLM have not been tested. Here, we use simulations to  
106 perform a comparative analysis of the statistical performances of these approaches.  
107 We consider both weighted and unweighted bipartite interaction networks between  
108 species from two guilds A and B (Fig. 1). Our results lead us to propose an alternative  
109 approach for measuring phylogenetic signal in interaction networks, the sequential  
110 Mantel test. We also investigate the ability of Mantel tests to detect the presence of  
111 phylogenetic signal in the different clades of a phylogenetic tree, as phylogenetic  
112 signal may be localized. Finally, we provide general guidelines and illustrate them on  
113 an orchid-fungus mycorrhizal network identified across the oceanic island of Réunion  
114 (Martos et al. 2012).

115 **Figure 1: Illustration of the data used to test for phylogenetic signal in species**  
116 **interactions**

117 Toy example of an interaction network between orchids (in green) and  
118 mycorrhizal fungi (in brown) with associated phylogenetic trees. The bipartite  
119 interaction network between two guilds A (here the orchids) and B (the fungi) is  
120 represented by a matrix which elements indicate either whether or not species interact  
121 (*i.e.* 1 if they do and 0 otherwise, ‘unweighted’ or ‘binary’ network) or the frequency  
122 of the interaction (‘weighted’ network; for example here we indicated the number of  
123 times a given pairwise interaction has been observed using shades of gray from white  
124 (no interaction) to dark gray (many interactions)). Each guild is also characterized by  
125 a rooted phylogenetic tree, used to compute phylogenetic distances between pairs of  
126 species.

127

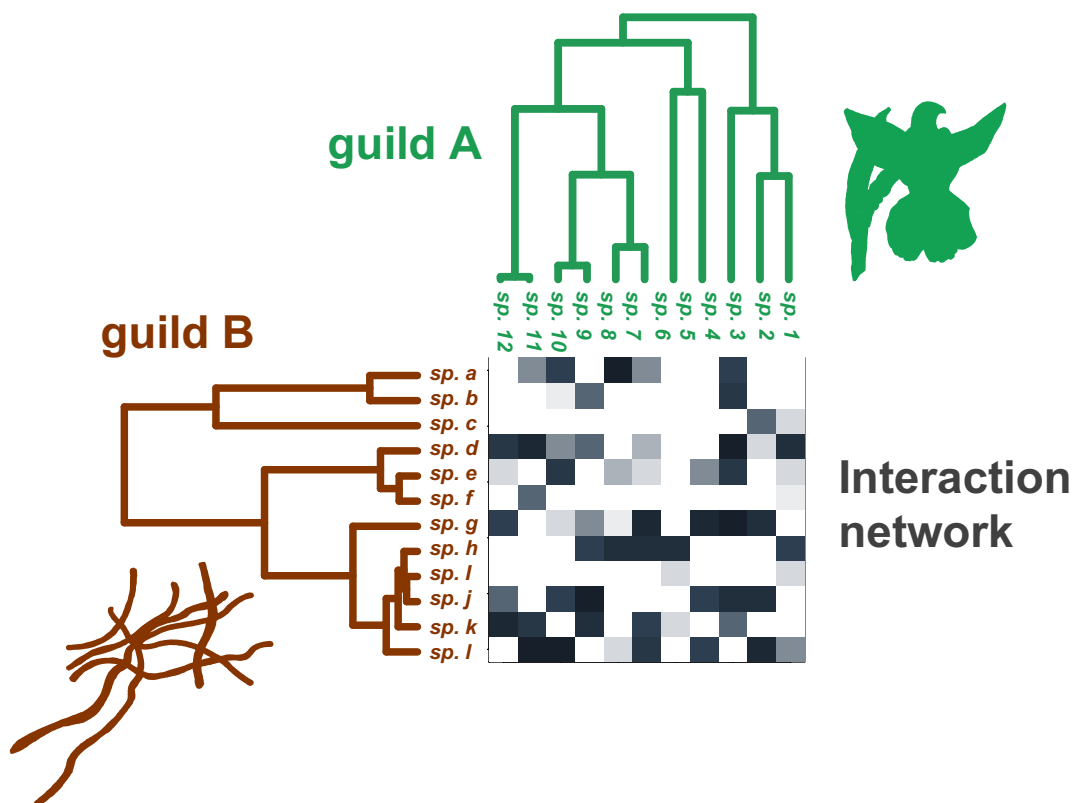

## 129 **Methods**

130

### 131 **Simulating bipartite interaction networks with or without phylogenetic signal in** 132 **species interactions**

133

134 We used *BipartiteEvol*, an individual-based eco-evolutionary model (see Maliet  
135 *et al.* 2020 for a complete description of the model), to generate interaction networks  
136 with or without phylogenetic signal between two guilds interacting in a mutualistic,  
137 antagonistic, or neutral way. In short, each individual from guild A (resp. B) is  
138 characterized by a multidimensional continuous trait and interacts with one  
139 individual from guild B (resp. A). The effect of this interaction on the fitness of each  
140 individual from guilds A or B is determined by the distance in trait space of the two  
141 interacting individuals, according to a classical trait matching expression  
142 parametrized by two parameters  $\alpha_A$  and  $\alpha_B$  (Supplementary Methods 1, Maliet *et al.*  
143 2020). These parameters determine the nature and specificity of the interaction:  
144 positive  $\alpha_A$  and  $\alpha_B$  correspond to mutualistic interactions, negative  $\alpha_A$  and positive  $\alpha_B$   
145 to antagonistic interactions (with guild A representing hosts/preys and guild B  
146 parasites/predators), high  $|\alpha|$  values to scenarios with strong fitness effects (*i.e.* highly  
147 specialized interactions), and  $|\alpha|$  values close to 0 to more neutral scenarios.  
148 *BipartiteEvol* simulates individual's deaths and births (proportional to the individual's  
149 fitness) and new individuals have a probability  $\mu$  to mutate, in which case new traits  
150 are drawn independently in a normal distribution centered on the parent traits.  
151 Networks simulated using *BipartiteEvol* show typical structural properties observed in  
152 empirical networks, including significant nestedness and/or modularity according to  
153 the sets of simulated parameters (Maliet *et al.* 2020): in general, antagonistic networks  
154 ( $\alpha_A < 0$ ) are modular, while neutral and mutualistic networks ( $\alpha_A = 0$  or  $\alpha_A < 0$ ) tend to be  
155 nested. Here, we considered that each combination of traits forms a new species  
156 instead of using the species delineation of the original *BipartiteEvol* model (Maliet *et*

157 al. 2020). This increased our ability to generate phylogenetic signal in the simulated  
158 networks without affecting their overall structure.

159 Under the *BipartiteEvol* model, closely related species tend to interact with  
160 similar sets of partners (*i.e.* there is a phylogenetic signal in species interactions) if (and  
161 only if): (1) closely related species have similar traits (*i.e.* there is a phylogenetic signal  
162 in species traits) and (2) these traits determine who interacts with whom, *i.e.*  $\alpha \neq 0$ .  
163 Similarly, an anti-phylogenetic signal in species interactions (*i.e.* the tendency for  
164 closely related species to associate with dissimilar partners) is expected if there is anti-  
165 phylogenetic signal in species traits (*i.e.* closely related species have dissimilar traits)  
166 and  $\alpha \neq 0$ .

167 Using the R-package RPANDA (Morlon et al. 2016; R Core Team 2020), we  
168 simulated a total of 2,400 interaction networks with individuals characterized by a six-  
169 dimensional trait. To obtain a wide range of network sizes, we considered a total  
170 number of 500, 1,000, 2,000, 3,000, 4,000, or 5,000 pairs of interacting individuals per  
171 simulation. For each size, we simulated the evolution of 100 neutral networks ( $\alpha_A=0$  ;  
172  $\alpha_B=0$ ), 120 mutualistic networks (**i**:  $\alpha_A=1$ ;  $\alpha_B=1$ ; **ii**:  $\alpha_A=0.1$ ;  $\alpha_B=0.1$ ; **iii**:  $\alpha_A=0.01$ ;  $\alpha_B=0.01$ ;  
173 **iv**:  $\alpha_A=1$ ;  $\alpha_B=0.1$ ; **v**:  $\alpha_A=1$ ;  $\alpha_B=0.01$ ; and **vi**:  $\alpha_A=0.1$ ;  $\alpha_B=0.01$ ) and 180 antagonistic networks  
174 (**i**:  $\alpha_A=-1$ ;  $\alpha_B=1$ ; **ii**:  $\alpha_A=-0.1$ ;  $\alpha_B=0.1$ ; **iii**:  $\alpha_A=-0.01$ ;  $\alpha_B=0.01$ ; **iv**:  $\alpha_A=-1$ ;  $\alpha_B=0.1$ ; **v**:  $\alpha_A=-1$ ;  
175  $\alpha_B=0.01$ ; **vi**:  $\alpha_A=-0.1$ ;  $\alpha_B=1$ ; **vii**:  $\alpha_A=-0.1$ ;  $\alpha_B=0.01$ ; **viii**:  $\alpha_A=-0.01$ ;  $\alpha_B=1$ ; **ix**:  $\alpha_A=-0.01$ ;  $\alpha_B=0.1$ ).  
176 We used a mutation rate  $\mu=0.01$  and followed the interacting individuals during  $5.10^7$   
177 death events. At the end, we extracted for each guild a species tree from its genealogy  
178 by randomly selecting one individual per species (Fig. S1), we also recorded the  
179 number of individuals belonging to each species, and counted the number of  
180 occurrences of each interspecific interaction; we then reconstructed the corresponding  
181 weighted interaction network. We evaluated whether these simulations generated  
182 realistic networks by comparing their structure with that of empirical networks  
183 (Supplementary Methods 2).

184 We separated the 2,400 simulated networks between those for which we should  
185 expect a phylogenetic signal in species interactions and those for which we should not.



186 We did not expect phylogenetic signal in species interactions in neutral networks and  
187 in non-neutral networks with no phylogenetic signal in species traits. Conversely, we  
188 expected phylogenetic signal in non-neutral networks with phylogenetic signal in  
189 species traits. We evaluated phylogenetic signal in species traits using two approaches.  
190 First, for simplicity and consistency with the rest of the paper, we used Mantel tests  
191 (Pearson correlation) between phylogenetic distances and trait distances computed as  
192 the Euclidian distances between trait values for each species pair. Second, given that  
193 model-based approaches usually perform better (Harmon and Glor 2010), we used a  
194 multivariate extension of Pagel's  $\lambda$  (Pagel 1999) implemented in R (Goolsby 2015); we  
195 assessed the significance of the phylogenetic signal in species traits with likelihood  
196 ratio tests comparing the inferred Pagel's  $\lambda$  model to a null model where  $\lambda=0$  (*i.e.* no  
197 phylogenetic signal).

198

### 199 **Computing phylogenetic signal in species interactions**

200

201 We computed phylogenetic signal in species interactions in the simulated  
202 networks using Mantel tests and PBLM, as well as the computationally-intensive  
203 PGLMM for the smallest networks. Complete descriptions of these methods are  
204 available in Supplementary Methods 3. Mantel tests, PBLM, and PGLMM rely on  
205 different strategies to evaluate the significance of the phylogenetic signal, and it could  
206 be argued that results of these tests are not directly comparable. Our approach is to  
207 follow the methodologies traditionally used in empirical studies and compare their  
208 conclusions (detection or not of a phylogenetic signal).

209

210 Mantel tests: We evaluated the phylogenetic signal in species interactions in guilds A  
211 and B separately using simple Mantel tests between phylogenetic and ecological (set  
212 of interacting partners) distances. Ecological distances were measured both without  
213 accounting for evolutionary relatedness of the interacting partners, using (weighted or  
214 unweighted) Jaccard, and accounting for relatedness using (weighted or unweighted)

215 UniFrac distances (Supplementary Methods 3 (Lozupone et al. 2011)). Accounting for  
216 evolutionary relatedness of the interacting partners can be particularly relevant for  
217 organisms with uncertain species delineations (e.g. microorganisms delineated using  
218 only molecular data (Martos et al. 2012; Sanders et al. 2014)). We used Pearson,  
219 Spearman, and Kendall correlations (R) by extending the *mantel* function in the R-  
220 package *ecodist* (Goslee and Urban 2007); the significance of each correlation was  
221 evaluated using 10,000 permutations, except for the computationally intensive Kendall  
222 correlation (100 permutations only). For each network, we considered that there was  
223 a significant phylogenetic signal (resp. anti-phylogenetic signal) if the correlation  
224 coefficient (R) was higher (resp. lower) than >95% of the randomized correlations; we  
225 computed the p-value of each one-tailed Mantel test as the fraction of the randomized  
226 correlations above (resp. below) the original value.

227

228 PBLM: To estimate phylogenetic signal based on PBLM, we modified the function *pblm*  
229 from the R-package *picante* (Kembel et al. 2010) to more efficiently perform matrix  
230 inversions and handle large interaction networks. In short, the parameters  $d_A$  and  $d_B$   
231 of the Ornstein-Uhlenbeck processes of PBLM were estimated using generalized least  
232 squares (Ives & Godfray 2006).  $d_A$  and  $d_B$  are interpreted as a measure of phylogenetic  
233 signal in species interactions: if  $d=0$ , there is no effect of the phylogeny (similar as  
234 evolution on a star phylogeny, *i.e.* no phylogenetic signal);  $0 < d < 1$  generates stabilizing  
235 selection (*i.e.* phylogenetic signal) and  $d > 1$  disruptive selection (*i.e.* anti-phylogenetic  
236 signal). We followed Ives & Godfray (2006; Supplementary Methods 3) by considering  
237 that the phylogenetic signal is significant when the mean square error (MSE) of the  
238 model is smaller than that obtained using star phylogenies ( $MSE_{star}$ ); we also used a  
239 more stringent criterion by considering that the signal is significant when the MSE is  
240 at least 5% lower than  $MSE_{star}$ . Finally, we applied the bootstrapping method of Ives &  
241 Godfray (2006; Supplementary Methods 3) to the smallest networks. A single PBLM  
242 inference can take several days to run (time measured on an Intel 2.8 GHz MacOSX  
243 laptop) on networks of intermediate sizes (between 50 and 100 species per guild),

244 which prevented us from applying the bootstrap approach to large networks; we  
245 therefore tested this approach on networks simulated with 500 individuals (*i.e.* a total  
246 of 400 networks).

247

248 PGLMM: We performed analyses of the statistical performances of PGLMM (Rafferty  
249 and Ives 2013) using the function *pglmm* in the R-package *phyr* (Li et al. 2020).  
250 Following the procedure used in Lajoie and Kembel (2021), we fitted for each network  
251 different models accounting or not for phylogenetic signals in both the number of  
252 partners and in the species interactions in both clades, using restricted maximum  
253 likelihood and evaluating significance with likelihood ratio tests. Because fitting these  
254 models can require large amount of memory (e.g. >80 Go for some networks with >50  
255 species per guild), we tested this approach on networks simulated with 500  
256 individuals. We fitted the PGLMM using either a Gaussian or a Poisson distribution  
257 of abundances for weighted networks, and a binomial distribution (presence/absence  
258 data) for unweighted networks (Li et al. 2020).

259

## 260 **Confounding effect of the phylogenetic signal in the number of partners**

261

262 To test the performances of the partial Mantel test at measuring phylogenetic  
263 signal in species interactions while controlling for the number of partners  
264 (Supplementary Methods 3), we first performed partial Mantel tests between  
265 phylogenetic and ecological distances, while controlling for the absolute differences in  
266 degrees, on the networks simulated with *BipartiteEvol*. There is no reason that  
267 *BipartiteEvol* simulations generate a phylogenetic signal in the number of partners, and  
268 we verified this by performing Mantel tests between phylogenetic distances and  
269 degree differences. Partial Mantel tests were performed to assess whether they lose  
270 power compared to simple Mantel tests. If they do not suffer power loss, partial Mantel  
271 tests applied to *BipartiteEvol* simulations should be significant when simple Mantel  
272 tests are significant.

273

274         Second, we assessed whether partial Mantel tests successfully correct for  
275 phylogenetic signal in the number of partners using networks simulated under a  
276 process that generate phylogenetic conservatism in the number, but not the identity,  
277 of interacting partners (*i.e.* partial Mantel tests should not be significant when applied  
278 to such networks). To simulate network with only phylogenetic conservatism in the  
279 number of partners in guild A, we first simulated phylogenetic trees for guilds A and  
280 B using *pbtree* (R-package *phytools*; Revell 2012) with a number of species uniformly  
281 sampled between 40 and 150 by guild. Next, we simulated the number of partners of  
282 the species from guild A using an Ornstein-Uhlenbeck process with an attraction  
283 toward 0, a variance of 0.1 (noise of the Brownian motion), and a selection strength ( $a_A$ )  
284 ranging from 5 (strong stabilizing effect, weak phylogenetic signal) to 0 (Brownian  
285 motion, strong phylogenetic signal). We computed the number of partners per species  
286 by calibrating the simulated values between 1 and the number of species in guild B  
287 and taking the integer part. For each  $a_A$  value (5, 1, 0.5, 0.05, or 0), we performed 100  
288 simulations using *mvSIM* (R-package *mvMORPH*; Clavel *et al.* 2015). Finally, for each  
289 species in A, we attributed the corresponding number of partners in B at random to  
290 obtain binary networks. We checked that our simulations indeed generated a signal in  
291 the number of partners by performing simple Mantel tests between phylogenetic and  
292 degree difference distances. Finally, we performed on each simulated network a  
293 partial Mantel test between phylogenetic and ecological distances, while controlling  
294 for the absolute differences in degrees.

295

296         Given the poor performances of partial Mantel tests (see Results), we tested  
297 whether using sequential Mantel tests would provide a good alternative: based on  
298 simple Mantel tests, we consider that there is a phylogenetic signal in the identity of  
299 the partners if there is a phylogenetic signal in species interactions and no phylogenetic  
300 signal in the number of partners. We applied this sequential testing to all our simulated  
301 networks.

302

303 **Effect of phylogenetic uncertainty, sampling asymmetry, and network**  
304 **heterogeneity on measures of phylogenetic signal in species interactions**

305

306 Unlike simulations (such as those provided by *BipartiteEvol*), empirical bipartite  
307 networks suffer from uncertainty in the phylogenetic reconstructions (*e.g.* in the  
308 microbial partners' tree when studying host-associated microbiota – which often  
309 prevents accounting for evolutionary relatedness; *i.e.* using UniFrac distances),  
310 sampling asymmetry (*i.e.* one side of the network is more thoroughly sampled than  
311 the other), and network heterogeneity (*i.e.* different sub-clades in the network have  
312 different levels of phylogenetic signal). We performed additional analyses to  
313 investigate the effect of these aspects on phylogenetic signal in species interactions  
314 measured using simple Mantel tests.

315

316 First, we tested the effect of phylogenetic uncertainty in the partners' tree on the  
317 measure of phylogenetic signal when evolutionary relatedness is accounted for (*i.e.*  
318 using UniFrac distances). We performed these analyses to assess whether accounting  
319 for the partners' evolutionary relatedness remains advantageous (see Results) when  
320 phylogenetic uncertainty is high. To add some variability in the phylogenetic tree of  
321 guild B (resp. A) used to compute the UniFrac distances between species pairs from  
322 guild A (resp. B), we first simulated, on the original partners tree, the evolution of a  
323 short DNA sequence and then reconstructed the tree from the simulated DNA  
324 alignment using neighbor-joining (*nj* function, R-package APE (Paradis et al. 2004)).  
325 We used *simulate\_alignment* (R-package HOME; Perez-Lamarque & Morlon 2019) to  
326 simulate sequences of length 75, 150, 300, 600, or 1,200 base-pairs, with 30% of variable  
327 sites, and a substitution rate of 1.5 (shorter fragments should result in noisier  
328 phylogenies).

329

330           Second, we tested the influence of sampling asymmetry on measures of  
331 phylogenetic signal. Empirical networks are often an incomplete representation of the  
332 actual interactions between two guilds because they are under-sampled, and  
333 frequently, in an asymmetrical way. For instance, by sampling targeted species from  
334 guild A, observed networks are constituted by few species from guild A which have  
335 the complete set of their partners and by often more species from guild B which have  
336 an incomplete set of their partners (as they likely interact with unsampled species from  
337 guild A). We tested the influence of such sampling asymmetry by selecting only 10%  
338 of the most abundant species from guild A in each simulated network (while retaining  
339 at least 10 species) and computed phylogenetic signal in these asymmetrically-  
340 subsampled networks.

341

342           Third, both Mantel tests and PBLM neglect the heterogeneity within networks.  
343 Indeed, a non-significant phylogenetic signal at the level of the entire network can  
344 potentially hide a sub-clade of species presenting significant phylogenetic signal.  
345 Alternatively, a phylogenetic signal in the entire network may be driven by only two  
346 sub-clades of guilds A and B, while the other sub-clades present no significant  
347 phylogenetic signal. To explore the potential heterogeneity of the phylogenetic signal  
348 within one guild, one possibility is to apply Mantel tests to the sub-networks formed  
349 by a given sub-clade (*e.g.* Song *et al.* 2020). For each node of the tree of guild A having  
350 at least 10 descendants, we estimated the clade-specific phylogenetic signal using a  
351 Mantel test investigating whether closely related species from this sub-clade of A tend  
352 to interact with similar partners (and *vice-versa* for guild B). Using UniFrac distances,  
353 we performed the Mantel tests with 100,000 permutations, and introduced a  
354 Bonferroni correction for multiple testing to keep a global alpha-risk of 5%. To test this  
355 approach, we generated synthetic networks with known sub-clade signal by  
356 artificially combining networks simulated under neutrality with networks simulated  
357 with the mutualistic parameters  $\mathbf{v}$  (see Results). We grafted each “mutualistic”  
358 phylogenetic tree from guilds A and B within a “neutral” phylogenetic tree by

359 randomly selecting a branch, such that it creates a separate module with strong  
360 phylogenetic signal. Such simulations could correspond to the evolution of a different  
361 niche, *e.g.* terrestrial *versus* epiphytic plants associating with different mycorrhizal  
362 fungi (Martos et al. 2012). We then performed our clade-specific analysis of  
363 phylogenetic signal and investigated in which nodes we recovered a significant  
364 phylogenetic signal.

365

### 366 **General guidelines and illustration with application on the orchid-fungus** 367 **mycorrhizal network from La Réunion**

368

369 We used our results and other empirical considerations to provide general  
370 guidelines for testing for phylogenetic signal in interaction networks. We illustrated  
371 these guidelines by applying them in a network between orchids and mycorrhizal  
372 fungi from La Réunion island (Martos et al. 2012). This network encompasses 70 orchid  
373 species (either terrestrial or epiphytic species) and 93 molecularly-identified fungal  
374 partners (defined according to 97% sequence similarity; Martos *et al.* 2012). We  
375 gathered the maximum-likelihood plant and fungal phylogenies on TreeBASE (Study  
376 Accession S12721), calibrated the orchid phylogeny using a relaxed clock with *chronos*  
377 (Paradis 2013), and arbitrarily added 10 million-years-old polytomies in unresolved  
378 genera to obtain a species-level orchid phylogeny.

## 379 Results

380

### 381 Expected phylogenetic signal in species interactions in *BipartiteEvol* networks

382

383 The networks simulated using *BipartiteEvol* gave large ranges of sizes for guilds  
384 A and B (from less than 50 to more than 250 species; Fig. S2) and had structural  
385 properties comparable to those of empirical networks (Fig. S3), meaning that these  
386 simulated networks are realistic.

387 Using Mantel tests, we found a significant phylogenetic signal in species traits  
388 for most antagonistic and neutral simulations (Fig. S4A). In contrast, for many  
389 mutualistic simulations, closely related species often did not tend to have similar traits,  
390 except when  $\alpha_B=0.01$  (*i.e.* mutualistic parameters **iii**, **v**, and **vi**; Fig. S4A). When  $\alpha_B$  were  
391 higher (*i.e.* mutualistic parameters **i**, **ii**, and **iv**), we suspect stabilizing selection to  
392 occur and erase the phylogenetic signal in the traits (Maliet et al. 2020): we therefore  
393 do not expect phylogenetic signal in species interactions for these simulations, which  
394 represent ~40% of the mutualistic simulations. In addition, we found an anti-  
395 phylogenetic signal in species traits in less than 1% of the simulations (Fig. S4A). Given  
396 that we do not expect *BipartiteEvol* to generate anti-phylogenetic signal in species traits  
397 and given that the alpha-risk of Mantel tests is 5%, these 1% of networks with an anti-  
398 phylogenetic signal in species traits are likely false-positives. We removed them when  
399 evaluating the performance of the different approaches and we therefore do not expect  
400 anti-phylogenetic signal in species interactions for the networks we tested. Results  
401 were similar with Pagel's  $\lambda$ , with a significant phylogenetic signal in species traits for  
402 almost all antagonistic and neutral simulations, and in ~65% of the mutualistic  
403 simulations (Fig. S4B). Mantel tests and Pagel's  $\lambda$  lead to identical conclusions for >95%  
404 of the simulated networks.

405

406



## 407 **Computing phylogenetic signal in species interactions in *BipartiteEvol* networks**

408

409       Using Mantel tests, as expected, we did not find a significant phylogenetic  
410 signal in species interactions for most neutral networks or for networks with no signal  
411 in species traits (Figs. 2 & S5): the type-I error rate was below 5%, corresponding to the  
412 alpha-risk of the test (Table S1), with one notable exception for small networks when  
413 using weighted Jaccard distances and Pearson correlations (~8% type-I error).  
414 Conversely, we detected a significant unexpected anti-phylogenetic signal in more  
415 than 10% of the simulated networks, in particular in the small ones (Figs. 2 & S5).

416

417       Many mutualistic or antagonistic networks where we expected a phylogenetic  
418 signal in species interactions (*i.e.* non-neutral networks with signal in species traits)  
419 presented no significant signal with Mantel tests (Figs. 2 & S5), in particular those  
420 simulated with low  $\alpha_A$  and  $\alpha_B$  values (*e.g.* antagonism **vii**), where non-neutral effects  
421 were weak. Mantel tests measuring phylogenetic signal in species interactions were  
422 most often not significant unless the phylogenetic signal in species traits was strong  
423 ( $R > 0.6$ ; Fig. S6). Even when the phylogenetic signal in species traits was very strong  
424 ( $R > 0.9$ ), the phylogenetic signal in species interactions was not significant in many  
425 networks. In mutualistic networks, phylogenetic signals in species interactions were  
426 present only when there was a large asymmetry in the effects of trait matching on the  
427 fitnesses of the species from guilds A or B (case **v**:  $\alpha_A = 1$ ;  $\alpha_B = 0.01$ ), *i.e.* when only one  
428 guild was specialized. Conversely, in antagonistic networks, phylogenetic signals  
429 were found mainly when trait matching had a strong impact on the fitness of guild B  
430 (the obligate parasites/predators;  $\alpha_B \geq 0.1$ ). Additionally, when phylogenetic signal was  
431 significant in one guild, it was generally also significant in the other; in antagonistic  
432 networks, the signal was usually higher in guild A compared to guild B (Fig. S5).

433

434

435 **Figure 2: Statistical performances of the simple Mantel tests and the Phylogenetic**  
436 **bipartite linear model (PBLM; Ives & Godfray, 2006)**

437 For each panel, the simulations are divided between networks where phylogenetic  
438 signal in species interactions is expected (*i.e.* networks (i) simulated with an effect of  
439 the traits on individual fitness - antagonistic and mutualistic simulations - and (ii)  
440 presenting traits that are phylogenetically conserved according to a Mantel test – see  
441 Supplementary Figure 4A) and networks where phylogenetic signal in species  
442 interactions is not expected (*i.e.* neutral simulations ( $\alpha = 0$ ) or simulated networks  
443 where we observed no phylogenetic signal in the traits). Results are similar when the  
444 expectations are based on Pagel's  $\lambda$  to measure the phylogenetic signals in species  
445 traits (Supplementary Figure 10).

446

447 **a-d:** Phylogenetic signals in species interactions estimated using simple Mantel tests  
448 with Pearson correlation ( $R$ ) in the guilds A (a, c) and B (b, d). The different panels in  
449 rows correspond to the 2 tested ecological distances: weighted Jaccard (a, b) or  
450 weighted UniFrac (c, d) distances. One-tailed Mantel tests between phylogenetic  
451 distances and ecological distances were performed using 10,000 permutations. In each  
452 panel, the bars indicate the percentage of simulated networks that present a significant  
453 positive correlation (in green;  $p\text{-value} > 0.05$  for the test of phylogenetic signal), a  
454 significant negative correlation (in red;  $p\text{-value} > 0.05$  for the test of anti-phylogenetic  
455 signal), or no significant correlation (in yellow; both  $p\text{-values} > 0.05$ ). Significant  
456 phylogenetic signals (resp. anti-phylogenetic signals) are shaded from light green to  
457 dark green according to the strength of the signal: we arbitrarily considered a “low  
458 signal” when  $R < 0.05$  (resp.  $R > -0.05$ ), an “intermediate signal” when  $0.05 < R < 0.15$  (resp.  
459  $-0.05 > R > -0.15$ ), and a “strong signal” when  $R > 0.15$  (resp.  $R < -0.15$ ).

460

461 **e:** Phylogenetic signals estimated using PBLM. For a given combination of parameters,  
462 the bar indicates the percentage of simulated networks that present no significant (in  
463 yellow;  $MSE \geq MSE_{\text{star}}$ ) or a significant (green;  $MSE < MSE_{\text{star}}$ ) phylogenetic signal.

464 Phylogenetic signals are shaded from light green to dark green according to the  
 465 strength of the signal: we arbitrarily considered a “low signal” when  $d_A < 0.05$  and  
 466  $d_B < 0.05$ , an “intermediate signal” when  $d_A > 0.05$  or  $d_B > 0.05$ , and a “strong signal” when  
 467  $d_A > 0.15$  or  $d_B > 0.15$ . PBLM were run on the weighted networks.

468

469 In each panel, the first bar indicates the statistical power of the test, whereas the second  
 470 and third bar indicate the type-I error rate of the test. Note that the strength the  
 471 phylogenetic signals (based on the R and d values) are not directly comparable.

472

473 Results discriminating the simulated networks of different sizes and with different sets  
 474 of parameters are available in Figures S5 & S7.

475

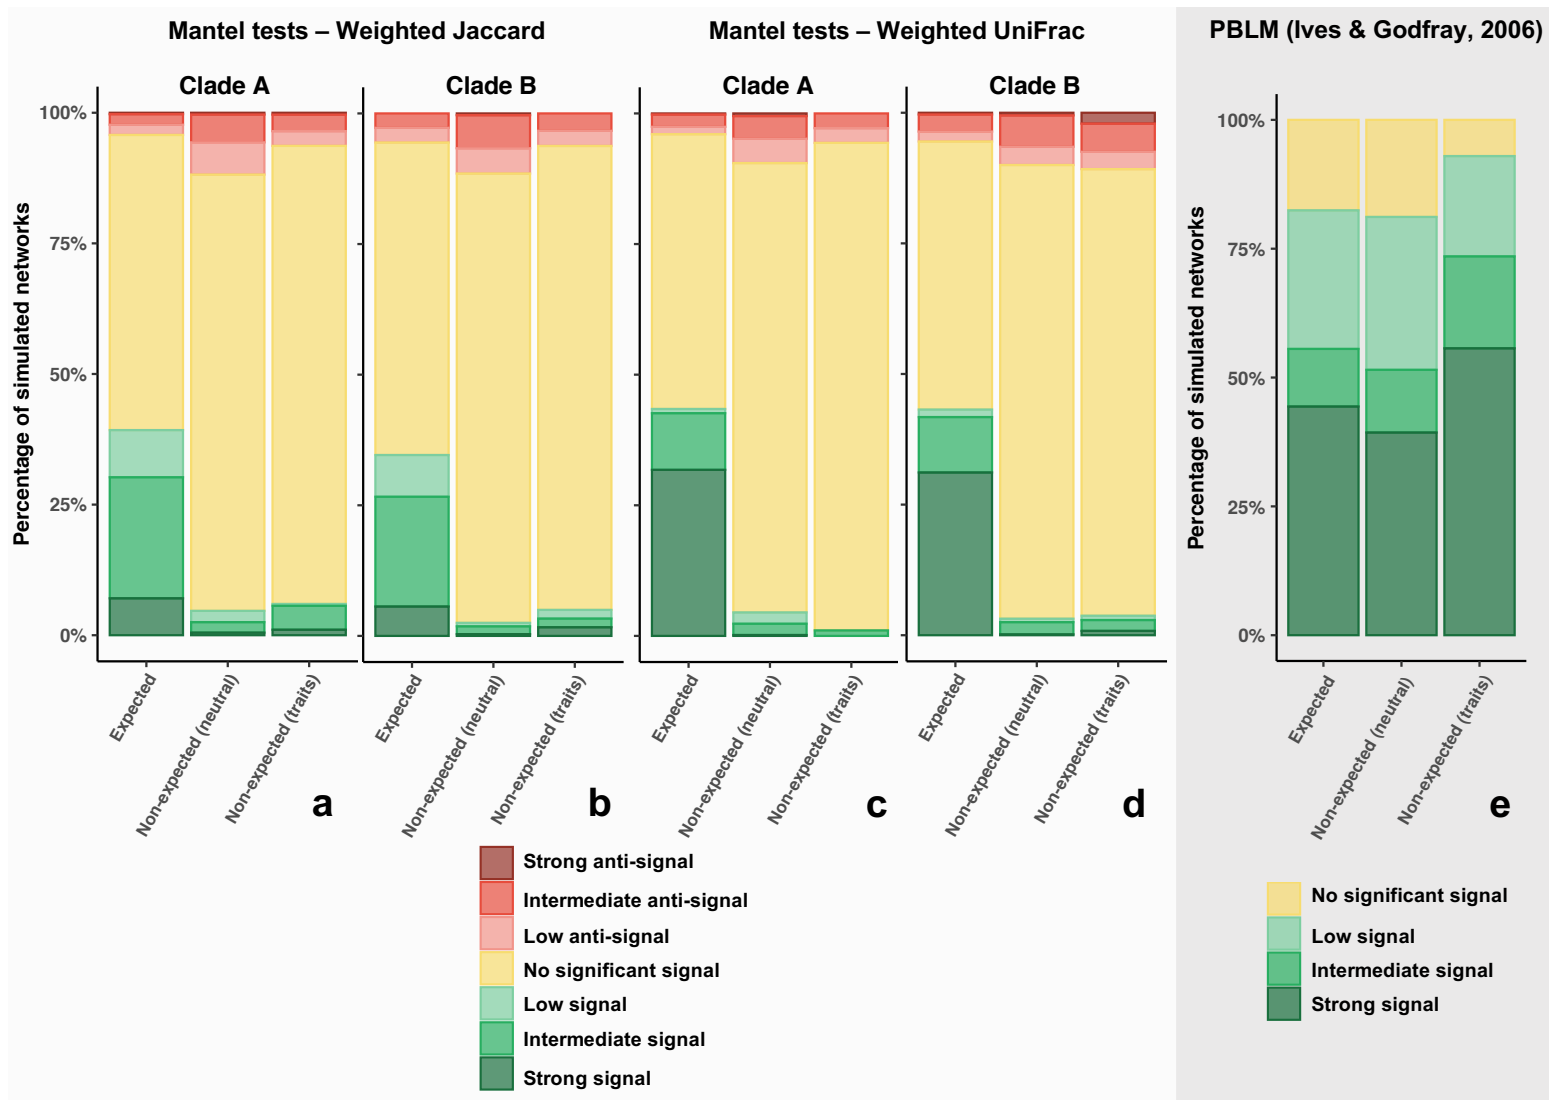

476           The statistical power of Mantel tests measuring phylogenetic signal in species  
477 interactions seems to be modulated by network size, as phylogenetic signals were less  
478 often significant but generally stronger in smaller networks (Fig. S5). Moreover,  
479 Mantel tests based on Pearson correlations had higher power than Spearman and  
480 Kendall correlations (Fig. S5) and weighted UniFrac distances outperformed other  
481 ecological distances in terms of power (Fig. S5; Table S2).

482

483           When using mean square errors to evaluate the significance of PBLM, we found  
484 a significant phylogenetic signal in species interactions in most of the simulated  
485 networks including when we did not expect any (Fig. 2e). The strength and the  
486 significance of the inferred phylogenetic signals were independent of the strength of  
487 the phylogenetic signal in species traits (Fig. S6). The propensity of PBLM to detect  
488 phylogenetic signal decreased in large unweighted networks, but the type-I errors  
489 remained >30%, including when using a more stringent significance cutoff (Figs. S7).  
490 Similar results were obtained when bootstrapping to evaluate the significance (Fig.  
491 S8). PGLMM on weighted networks with a Gaussian or Poisson distribution had  
492 slightly lower but still high type-I error rates (>25% or 20%, respectively) and  
493 intermediate statistical power (<50%) when measuring phylogenetic signals in species  
494 interactions (Fig. S9). PGLMM also often artifactually detected phylogenetic signals in  
495 the number of partners (Fig. S9). Conversely, PGLMM on unweighted networks never  
496 detected any significant signal (Fig. S9).

497

498           We inferred similar statistical performances of both Mantel tests and PBLM  
499 when we used Pagel's  $\lambda$  to evaluate phylogenetic signal in species traits (Figs. S6 and  
500 S10).

501

## 502 **Confounding effect of the phylogenetic signal in the number of partners**

503

504 As expected, tests of phylogenetic signal in the number of partners were non-  
505 significant in the large majority of the *BipartiteEvol* networks, especially the larger ones  
506 (Fig. S11). We did however observe significant correlations between ecological  
507 distances and degree difference distances (Fig. S12). Partial Mantel tests testing for  
508 phylogenetic signal in species interactions while accounting for phylogenetic signal in  
509 the number of partners had similar type-I error and power as simple Mantel tests (Figs.  
510 S5 & S13; Table S2). Performing sequential Mantel tests decreased the statistical power  
511 by less than 2% (Table S2).

512

513 Networks simulated with phylogenetic conservatism in the number, but not the  
514 identity of partners covered a realistic range of sizes (Fig. S14). As expected, Mantel  
515 tests revealed significant phylogenetic signals in the number of partners in >60% of  
516 these networks, with an increasing percentage of significant tests with decreasing  $\alpha_A$   
517 (*i.e.* increasing conservatism in the number of partners; Fig. S15). We found significant  
518 correlations between degree differences and ecological distances in most of these  
519 simulated networks (Fig. S16). As a result, simple Mantel tests testing for phylogenetic  
520 signal in species interactions without accounting for phylogenetic signal in the number  
521 of partners were frequently significant (>30%; Fig. S17; Table S3). Partial Mantel tests  
522 controlling for degree differences slightly decreased the proportion of false-positives,  
523 but it remained high (type-I error >25%; Fig. S18). In addition, partial Mantel tests  
524 detected a spurious significant anti-phylogenetic signal in species interactions in >15%  
525 of the networks (Fig. S18). Conversely, only few networks with a significant simple  
526 Mantel test in species interactions did not produce a significant simple Mantel test in  
527 the number of partners, such that sequential Mantel tests had only a ~7% type-I error  
528 rate (Table S3).

529

530 **Effect of phylogenetic uncertainty, sampling asymmetry, and network**  
531 **heterogeneity on measures of phylogenetic signal in species interactions**

532

533 The statistical power of Mantel tests using UniFrac distances decreased, as  
534 expected, when the length of the simulated DNA sequences decreased (*i.e.* when  
535 phylogenetic uncertainty increased; Fig. S19). However, even when the simulated  
536 DNA sequences were the shortest (75 base-pairs), resulting in very noisy reconstructed  
537 partners' tree (Fig. S20), the statistical power of the Mantel tests using UniFrac  
538 distances remained larger than when using Jaccard distances (Fig. S19).

539

540 Our results on the statistical performance of tests of phylogenetic signal were  
541 similar when considering sampling asymmetry (Figs. S21-24): PBLM spuriously  
542 detected phylogenetic signal when it should not, and Mantel tests had decent  
543 statistical performances, especially when using weighted UniFrac distances. In  
544 addition, the correlations of the Mantel tests in guild A were generally higher when  
545 significant (Fig. S23).

546

547 Our clade-specific tests of phylogenetic signal using Mantel tests while  
548 correcting for multiple testing recovered a significant phylogenetic signal in 82% of the  
549 nodes where mutualism originated (Fig. S25), as well as in most of the ascending  
550 nodes. Conversely, we did not find spurious phylogenetic signals in nodes with only  
551 neutrally-evolving lineages (Fig. S25).

552

553 **General guidelines and illustration with application on the orchid-fungus**  
554 **mycorrhizal network from La Réunion**

555

556 Figure 3 provides general guidelines based on our results and empirical  
557 considerations for accurate tests of phylogenetic signal in interaction networks. We  
558 applied these guidelines on the orchid-fungus mycorrhizal network from La Réunion

559 (available in Martos et al. (2012)). First (step 1), simple Mantel tests of phylogenetic  
560 signal in species interactions for fungi and orchids revealed a significant but low  
561 phylogenetic signal ( $R < 0.10$ ) on the orchid side using Jaccard distances; however, the  
562 significance disappeared with UniFrac distances (Table S4). Similarly, marginally not-  
563 significant and low phylogenetic signals were detected in the mycorrhizal fungi side  
564 ( $R < 0.04$ ; Table S4). Next (step 2), simple Mantel tests of phylogenetic signal in the  
565 number of partners were not significant ( $p\text{-values} > 0.05$ ). Our investigation of clade-  
566 specific phylogenetic signals in species interactions in orchids (option 1) revealed a  
567 significant phylogenetic signal in Angraecinae, a sub-tribe composed of 34 epiphytic  
568 species (sequential Mantel test:  $R = 0.37$ ; Bonferroni-corrected  $p\text{-value} = 0.016$ ; Fig. 4)  
569 interacting with 53 fungi, suggesting that closely related Angraecinae tend to interact  
570 with more similar mycorrhizal fungi. When we checked the robustness of the  
571 significant phylogenetic signal detected in Angraecinae (option 2) by subsampling the  
572 Angraecinae clade down to 10 species, we still recovered significant signal in species  
573 interactions in both cases (Fig. S26).

574

575 **Figure 3: Recommended guidelines to measure phylogenetic signal in species**  
576 **interactions within bipartite ecological networks.**

577 This guideline is composed of two fixed steps followed by two optional ones and can  
578 be applied as soon as a bipartite interaction network (with or without abundances)  
579 and at least the phylogenetic tree of guild A are available. The phylogenetic tree does  
580 not need to be binary, rooted, or ultrametric. For each step, an example of the  
581 corresponding function available in the R-package RPANDA is indicated in grey.

582 **Step 1:** The first step consists in testing for phylogenetic signal in species interactions  
583 for guild A (*i.e.* whether closely related species from guild A tend to interact with  
584 similar partners from guild B) using a one-tailed simple Mantel test. This step requires  
585 to pick an ecological distance (UniFrac distances are recommended compared to  
586 Jaccard distances) and a type of correlation (Pearson correlation by default).

587 **Step 2:** Next, to assess whether a phylogenetic signal in species interactions really  
588 comes from the identity of species interactions, the second step consists in testing  
589 whether there is phylogenetic signal in the number of partners of guild A (*i.e.* whether  
590 closely related species from guild A tend to interact with the same number of partners  
591 from guild B) using a one-tailed simple Mantel test.

592 **Option 1:** Clade-specific phylogenetic signal in guild A can be tested using simple  
593 Mantel tests while correcting for multiple testing (*e.g.* Bonferroni correction). It can be  
594 used to test whether some clades present different intensities of phylogenetic signal  
595 (*e.g.* because of higher specificity).

596 **Option 2:** The robustness of the findings can be tested by looking at how the  
597 conclusions might be affected by phylogenetic uncertainty (*e.g.* using a Bayesian  
598 posterior of tree) or sampling bias. The potential effect of sampling bias can be  
599 investigated by subsampling all clades to the same number of species.

600 If a phylogenetic tree for guild B is available, all these steps can be replicated to test  
601 for phylogenetic signal in species interaction in guild B.



## Phylogenetic signal in guild A:

**Step 1:** test the phylogenetic signal in the **species interactions** (simple Mantel test)

- (i) choice of ecological distances (Jaccard, UniFrac...)
- (ii) with or without interaction abundances

```
phylosignal_network(network, tree_A, tree_B,  
method = "GUniFrac", correlation = "Pearson")
```

**Step 2:** test the phylogenetic signal in the **number of partners** (simple Mantel test)

```
phylosignal_network(network, tree_A,  
method = "degree", correlation = "Pearson")
```

**Option 1:** investigate clade-specific phylogenetic signals (simple Mantel tests with Bonferroni correction)

```
phylosignal_sub_network(network, tree_A, tree_B,  
method = "GUniFrac", correlation = "Pearson")
```

**Option 2:** test the robustness of the findings to phylogenetic uncertainty and/or sampling bias

**(repeat for guild B)**

602

603

604 **Figure 4: Empirical application on an orchid-fungus interaction network from La**  
605 **Réunion island (Martos *et al.*, 2012): the clade-specific analyses of phylogenetic**  
606 **signal in species interactions revealed a significant phylogenetic signal in the**  
607 **epiphytic subtribe Angraecinae.**

608 The orchid phylogeny (Martos *et al.*, 2012) is represented with its nodes colored  
609 according to the results of the Mantel test performed on the corresponding sub-  
610 network: in blue if non-significant, in grey when the node has less than 10 descendent  
611 species (the Mantel test was not performed), and in red when the phylogenetic signal  
612 is significant. Each one-tailed simple Mantel test was performed using the Pearson  
613 correlation and 100,000 permutations and its significance was evaluated while  
614 correcting for multiple testing (Bonferroni correction).

615 For each species, its habitat (terrestrial or epiphytic) is indicated at the tips of the tree  
616 and the main orchid clades are highlighted in colors. Only the genera are indicated at  
617 the tips of the tree (see Supplementary Figure S26 for the species list).

618

619

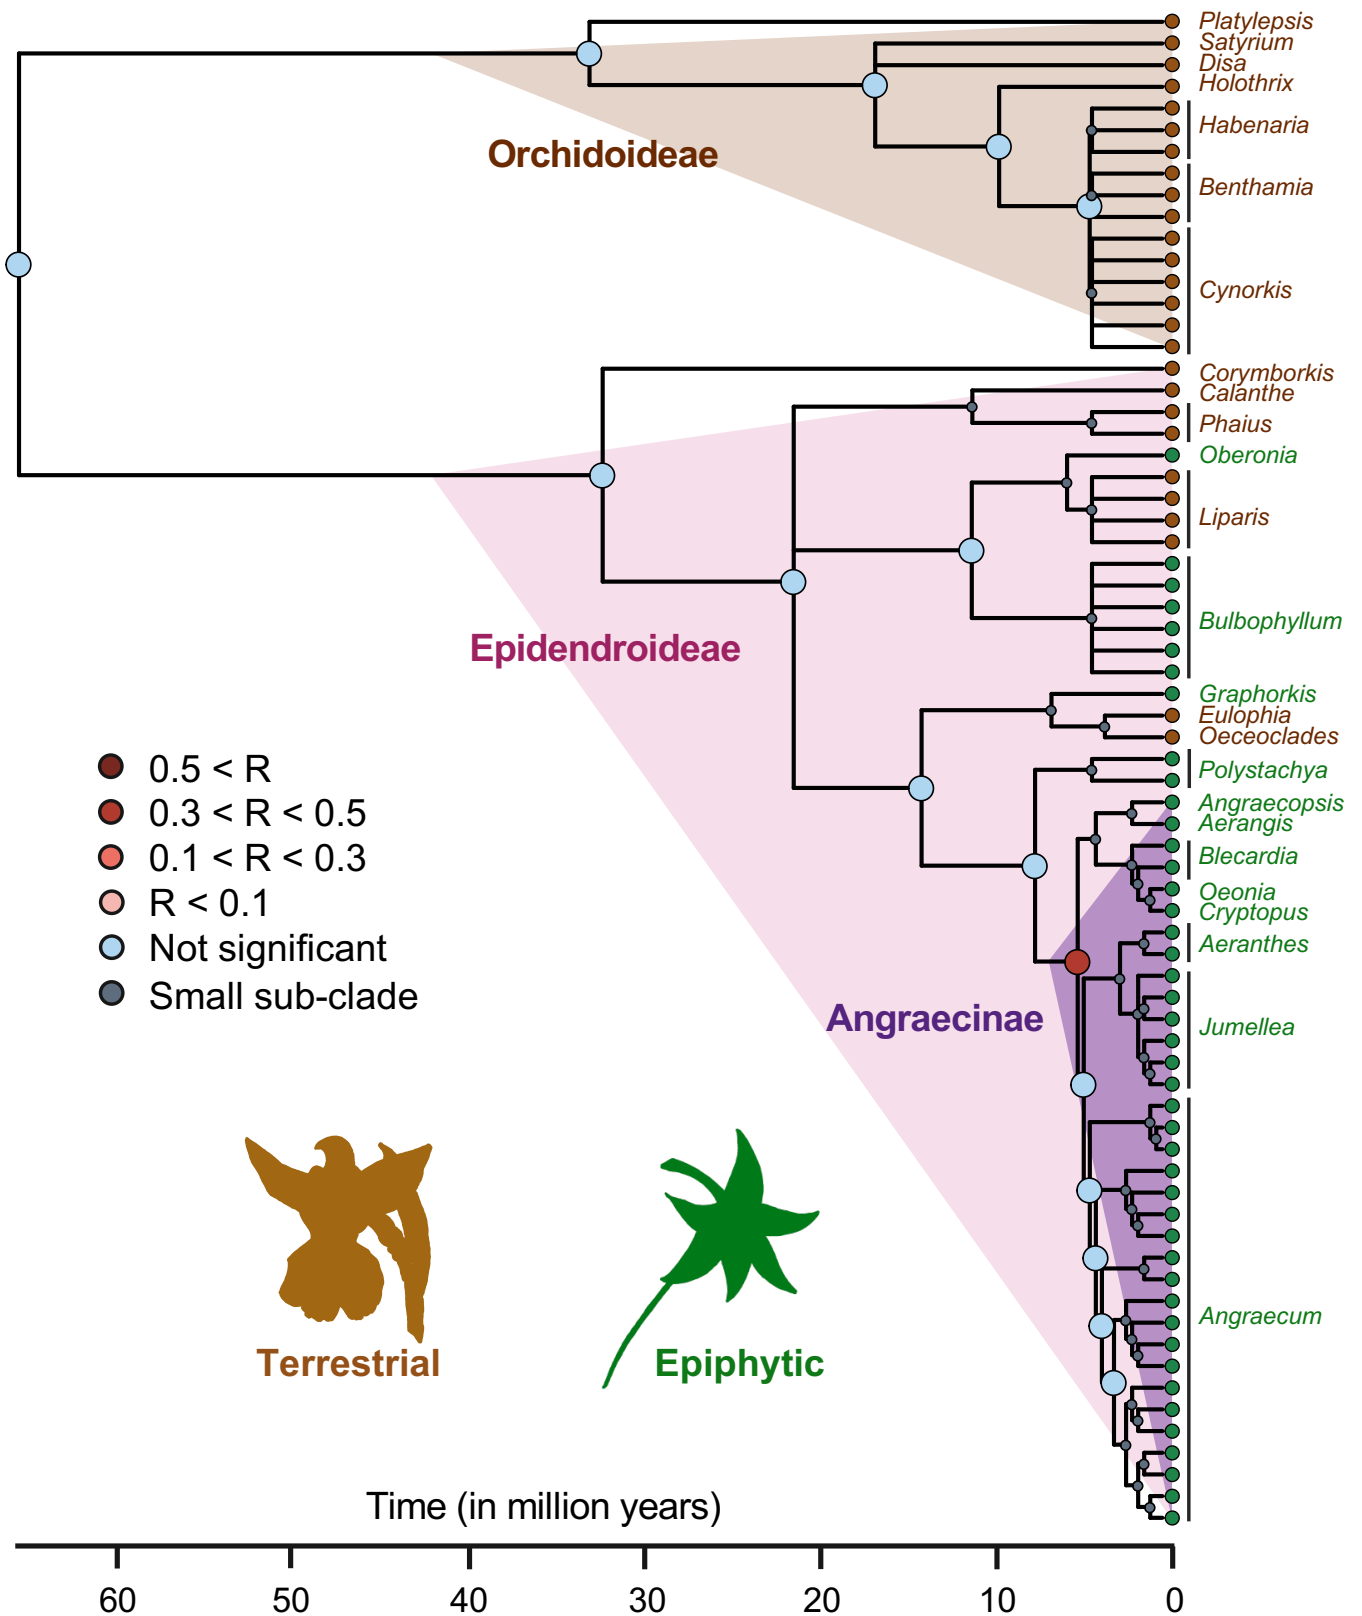

## 620 Discussion:

621

622 We used simulations to perform a comparative analysis of the statistical  
623 performances of Mantel tests and the Phylogenetic bipartite linear model (PBLM; Ives  
624 & Godfray 2006) for testing for phylogenetic signal in species interactions. Our results  
625 highlight the weaknesses of PBLM and partial Mantel tests, and advocate for the use  
626 of simple and sequential Mantel tests.

627

628 The Phylogenetic bipartite linear model (PBLM) is widely used to test for  
629 phylogenetic signal in species interactions, however we found that it has a very high  
630 type-I error rate (>30%). PBLM assumes that the interaction strength between two  
631 species is determined by the product of two unobserved traits evolving on the  
632 phylogenies of guilds A and B respectively, according to two independent Ornstein-  
633 Uhlenbeck processes with the selection strengths  $d_A$  and  $d_B$  (Supplementary Methods  
634 3). PBLM tests the significance of  $d_A$  and  $d_B$ , which measure the phylogenetic signal of  
635 the unobserved traits. A species with a high trait value will have high interaction  
636 strengths with many partner species (*i.e.* it is a generalist species), while a species with  
637 a low trait value will have low interaction strengths with most partner species, except  
638 with the few species with high trait values (*i.e.* it is a specialist species). Therefore, we  
639 suspect  $d_A$  and  $d_B$  to measure phylogenetic signals in the number of partners rather  
640 than in species interactions. However, we also found significant  $d_A$  and  $d_B$  in the  
641 absence of phylogenetic signal in the number of partners, suggesting that PBLM is  
642 sensitive to model misspecification (it relies on strong hypotheses on how the number  
643 of partners evolves). In any case, our results suggest that PBLM should not be used as  
644 a routine for measuring phylogenetic signal in species interactions.

645

646 Other model-based approaches that extend PBLM (Rafferty and Ives 2013;  
647 Hadfield et al. 2014; Li et al. 2020) allow to infer parameters thought to reflect the  
648 phylogenetic structure of interactions networks, while controlling for phylogenetic

649 signal in the number of parterns as well as heterogeneity in sampling effort (Hadfield  
650 *et al.*, 2014). Our analyses using the PGLMM approach (Rafferty and Ives 2013) on the  
651 smallest simulated networks suggested that it also has high type-I error rates and  
652 intermediate statistical power when using weighted interactions. It would have been  
653 ideal to also test this approach on larger networks, but this was prohibited by their  
654 computational cost. Indeed, fitting PGLMM can require >80 Go of memory for some  
655 networks and our application of the Bayesian approach of Hadfield *et al.* (2014) ran  
656 several days (on an Intel 2.8 GHz, MacOSX laptop) without reaching convergence.  
657 Because of these high computational demands, these methods are typically not used  
658 to measure phylogenetic signal in species interactions in empirical studies, which is  
659 either done using Mantel tests or PBLM (see Fontaine and Thébault 2015; Xing *et al.*  
660 2020; Corro *et al.* 2021 for recent examples). Future model developments of such  
661 approaches would thus benefit from faster inferences and our results highlight the  
662 need to thoroughly test these approaches with simulations before they are applied to  
663 empirical systems and biological conclusions are drawn.

664

665 We found that simple Mantel tests have a moderate statistical power and a  
666 reasonable type-I error rate (<5%) when testing for phylogenetic signal in species  
667 interactions. Not surprisingly, these tests have a higher power for larger simulated  
668 networks. The fact that Mantel tests have a moderate power for measuring  
669 phylogenetic signals in species interactions corroborates the findings about Mantel  
670 tests in other contexts (Harmon and Glor 2010; Guillot and Rousset 2013). Hence,  
671 although simple Mantel tests might fail at detecting low phylogenetic signal, we can  
672 trust their results when they are significant. On the contrary, we found a high  
673 proportion of simulated networks (5-10%) presenting a significant anti-phylogenetic  
674 signal in species interactions, although we did not expect any in our simulations  
675 (because we did not observe any anti-phylogenetic signal in species traits). False-  
676 positives are therefore frequent when testing for anti-phylogenetic signal using simple

677 Mantel tests and detection of such signal in empirical networks should be interpreted  
678 with caution.

679 In addition, Pearson correlations performed better than Spearman and Kendall  
680 correlations, which is somewhat surprising, as correlations between phylogenetic and  
681 ecological distances are not particularly expected to be linear: Spearman and Kendall  
682 correlations have less stringent hypotheses, as they only assume monotonicity  
683 (Supplementary Methods 3), but they probably lose information. We also reported that  
684 using ecological distances that consider interaction abundances and phylogenetic  
685 relatedness of the partners, such as weighted UniFrac distances, significantly improves  
686 the detection of phylogenetic signal, even when reconstructed partners trees are not  
687 robust. Given that species delineation may be somewhat arbitrary, especially for  
688 microbial interactors, and that Jaccard distances are directly sensitive to species  
689 delineation (Sanders et al. 2014), we advocate the use of weighted UniFrac distances.  
690 An exception might be if communities of interactors differ mainly in terms of recently  
691 diverged species; in this case Jaccard distances may perform better, as UniFrac  
692 distances emphasize differences in long branches rather than recent splits (Sanders et  
693 al. 2014). Finally, we found that multiple simple Mantel tests combined with a  
694 Bonferroni correction perform rather well to investigate clade-specific phylogenetic  
695 signals. Such an approach can therefore be valuable for measuring local phylogenetic  
696 signal in large “meta-networks”, such as those describing host-microbiota  
697 phyllosymbiosis (Song et al. 2020), which likely have heterogeneous phylogenetic  
698 signals across the network.

699

700 While simple Mantel tests have satisfactory statistical performances, these tests do  
701 not control for the potential confounding effect of phylogenetic signal in the number  
702 of partners. Partial Mantel tests are frequently used for investigating phylogenetic  
703 signal in species interactions while controlling for signal in the number of partners;  
704 however, we found that they often detected significant signals in species interactions  
705 when we simulated signals in only the number of partners. Thus, partial Mantel tests

706 fail at discerning whether evolutionary relatedness strictly affects the identity of  
707 partners, independently of the total number of partners associated with each species  
708 (Rezende et al. 2007). This corroborates the poor statistical performances of partial  
709 Mantel tests frequently observed in other contexts (Harmon and Glor 2010; Guillot and  
710 Rousset 2013). An alternative possibility is to perform sequential simple Mantel tests,  
711 testing first for phylogenetic signal in species interactions, and if significant, testing for  
712 phylogenetic signal in the number of partners. If there is no signal in the number of  
713 partners but a signal in interactions, then we can safely conclude that evolutionary  
714 relatedness strictly affects the identity of partners. This approach has a low type-I error  
715 rate and a very limited power decrease; however, it does not allow testing if there is a  
716 specific signal in species identity when there is a signal in the number of partners. A  
717 hint at whether signal in species interactions is entirely due to signal in the number of  
718 partners or not can be gained by comparing the correlation coefficients obtained when  
719 correlating phylogenetic distance to ecological distance *versus* degree distance.

720

721 By definition, phylogenetic signals in species interactions measure general patterns  
722 that are not informative of the processes at play (Losos 2008). A better understanding  
723 of the ecological and evolutionary processes playing a role in the assembly of  
724 interaction networks (Harmon et al. 2019) will require developing integrative process-  
725 based approaches, for instance inference machineries for eco-evolutionary models  
726 such as *BipartiteEvol*. Classical inferences (generalized least-squares or likelihood-  
727 based approaches) might be challenging for such complex models (Hadfield et al.  
728 2014), but strategies such as machine learning provide promising alternatives.

729

730 In the mycorrhizal network from La Réunion, we found non-significant or weak  
731 phylogenetic signals in species interactions at the level of the entire orchid-fungus  
732 network, suggesting these interactions are generally poorly conserved over long  
733 evolutionary timescales (Jacquemyn et al. 2011; Martos et al. 2012). Conversely, clade-  
734 specific Mantel tests detected a significant phylogenetic signal in the Angraecinae

735 epiphytic clade that is experiencing a radiation in La Réunion island. This signal is  
736 likely produced by the different orchids genera in Angraecinae associating with  
737 specific fungal clades (Martos et al. 2012). Thus, our results corroborate a trend toward  
738 mycorrhizal specialization in epiphytic orchids compared with terrestrial species  
739 (Xing et al. 2019), as the epiphytic habitats might require particular adaptations and  
740 stronger dependences toward specific mycorrhizal fungi.

741

742 Interaction networks are increasingly being analyzed to unravel the  
743 evolutionary processes shaping their structure and to predict their stability. Currently-  
744 used tools for measuring phylogenetic signals are clearly misleading. The alternative  
745 approach we propose based on sequential Mantel tests avoids false positive, but its  
746 statistical power is limited. By emphasizing the limits of current tests of phylogenetic  
747 signal, we hope to stimulate new developments in the statistical adjustment to  
748 empirical data of process-based models for the evolution of interaction networks.



749 **Acknowledgments:**

750 The authors acknowledge M. Elias, E. Thébault, and D. de Vienne for helpful  
751 discussions. They also thank I. Overcast, S. Lambert, I. Quintero, C. Fruciano, J. Clavel,  
752 and A. Silva for comments on an early version of the manuscript. This work was  
753 supported by a doctoral fellowship from the École Normale Supérieure de Paris  
754 attributed to BPL and the École Doctorale FIRE – Programme Bettencourt. Funding of  
755 the research of FM was from the Agence Nationale de la Recherche (ANR-19-CE02-  
756 0002). HM acknowledges support from the European Research Council (grant CoG-  
757 PANDA).

758

759 **Author contributions:**

760 All authors designed the study. BPL performed the analyses, BPi performed the  
761 analyses on the network structures, and FM gathered the empirical data. BPL and  
762 HM wrote the first draft of the manuscript and all authors contributed to revisions.

763

764 **Data accessibility:**

765 The R functions used to measure phylogenetic signals in bipartite interaction  
766 networks, including (simple, partial, and clade-specific) Mantel tests and PBLM, are  
767 available in the R-package RPANDA (Morlon et al. 2016) (functions  
768 *phylosignal\_network* and *phylosignal\_sub\_network*). A tutorial and the simulated  
769 networks can be found at [https://github.com/BPerezLamarque/Phylosignal\\_network](https://github.com/BPerezLamarque/Phylosignal_network).  
770 Amended functions of *BipartiteEvol* are also included in RPANDA.

771 The scripts for simulating the networks and for measuring the phylogenetic signals in  
772 species interactions are available at:

773 [https://github.com/BPerezLamarque/Phylosignal\\_network/tree/master/simulations](https://github.com/BPerezLamarque/Phylosignal_network/tree/master/simulations)

774

775

776 Supplementary data (including Supplementary Methods, Tables, and Figures) are  
777 available at:

778

779 [https://github.com/BPerezLamarque/Phylosignal\\_network/blob/master/Supplementa](https://github.com/BPerezLamarque/Phylosignal_network/blob/master/Supplementary_figures_phylo_signal_network.pdf)  
780 [ry\\_figures\\_phylo\\_signal\\_network.pdf](https://github.com/BPerezLamarque/Phylosignal_network/blob/master/Supplementary_figures_phylo_signal_network.pdf)

781

782 **Conflict of Interest statement:**

783 The authors declare that there is no conflict of interest.

784 **References:**

785

786 Aizen, M. A., G. Gleiser, M. Sabatino, L. J. Gilarranz, J. Bascompte, and M. Verdú.

787 2016. The phylogenetic structure of plant-pollinator networks increases with habitat  
788 size and isolation. *Ecology Letters* 19:29–36.

789 Bascompte, J., and P. Jordano. 2013. Mutualistic networks. Monographs in  
790 population biology (Princeton., Vol. 7). Princeton University Press, Princeton.

791 Bascompte, J., P. Jordano, C. J. Melian, and J. M. Olesen. 2003. The nested assembly of  
792 plant-animal mutualistic networks. *Proceedings of the National Academy of Sciences*  
793 100:9383–9387.

794 Blomberg, S. P., T. Garland, and A. R. Ives. 2003. Testing for phylogenetic signal in  
795 comparative data: Behavioral traits are more labile. *Evolution* 57:717–745.

796 Cattin, M.-F. F., L.-F. Bersier, C. Banašek-Richter, R. Baltensperger, J.-P. P. Gabriel, L.  
797 F. Bersler, C. Banašek-Richter, et al. 2004. Phylogenetic constraints and adaptation  
798 explain food-web structure. *Nature* 427:835–839.

799 Clavel, J., G. Escarguel, and G. Merceron. 2015. mvMORPH: An R package for fitting  
800 multivariate evolutionary models to morphometric data. (T. Poisot, ed.) *Methods in*  
801 *Ecology and Evolution* 6:1311–1319.

802 Corro, E. J., F. Villalobos, A. Lira-Noriega, R. Guevara, P. R. Guimarães, and W.  
803 Dáttilo. 2021. Annual precipitation predicts the phylogenetic signal in bat–fruit  
804 interaction networks across the Neotropics. *Biology Letters* 17.

805 Elias, M., C. Fontaine, and F. J. Frank Van Veen. 2013. Evolutionary history and  
806 ecological processes shape a local multilevel antagonistic network. *Current Biology*  
807 23:1355–1359.

808 Felsenstein, J. 1985. Phylogenies and the comparative method. *American Naturalist*  
809 125:1–15.

810 Fontaine, C., P. R. Guimarães, S. Kéfi, N. Loeuille, J. Memmott, W. H. van der Putten,  
811 F. J. F. van Veen, et al. 2011. The ecological and evolutionary implications of  
812 merging different types of networks. *Ecology Letters* 14:1170–1181.

- 813 Fontaine, C., and E. Thébault. 2015. Comparing the conservatism of ecological  
814 interactions in plant–pollinator and plant–herbivore networks. *Population Ecology*  
815 57:29–36.
- 816 Goolsby, E. W. 2015. Phylogenetic comparative methods for evaluating the  
817 evolutionary history of function-valued traits. *Systematic Biology* 64:568–578.
- 818 Goslee, S. C., and D. L. Urban. 2007. The ecodist package for dissimilarity-based  
819 analysis of ecological data. *Journal of Statistical Software* 22:1–19.
- 820 Guillot, G., and F. Rousset. 2013. Dismantling the Mantel tests. *Methods in Ecology*  
821 *and Evolution* 4:336–344.
- 822 Hadfield, J. D., B. R. Krasnov, R. Poulin, and S. Nakagawa. 2014. A tale of two  
823 phylogenies: Comparative analyses of ecological interactions. *The American*  
824 *Naturalist* 183:174–187.
- 825 Harmon, L. J., C. S. Andreazzi, F. Débarre, J. Drury, E. E. Goldberg, A. B. Martins, C.  
826 J. Melián, et al. 2019. Detecting the macroevolutionary signal of species interactions.  
827 *Journal of Evolutionary Biology* 32:769–782.
- 828 Harmon, L. J., and R. E. Glor. 2010. Poor statistical performance of the Mantel test in  
829 phylogenetic comparative analyses. *Evolution* 64:2173–2178.
- 830 Ives, A. R., and H. C. J. Godfray. 2006. Phylogenetic analysis of trophic associations.  
831 *The American Naturalist* 168:E1–E14.
- 832 Jacquemyn, H., V. S. F. T. Merckx, R. Brys, D. Tyteca, B. P. A. A. Cammue, O.  
833 Honnay, and B. Lievens. 2011. Analysis of network architecture reveals phylogenetic  
834 constraints on mycorrhizal specificity in the genus *Orchis* (Orchidaceae). *New*  
835 *Phytologist* 192:518–528.
- 836 Kembel, S. W., P. D. Cowan, M. R. Helmus, W. K. Cornwell, H. Morlon, D. D.  
837 Ackerly, S. P. Blomberg, et al. 2010. Picante: R tools for integrating phylogenies and  
838 ecology. *Bioinformatics* 26:1463–1464.
- 839 Krasnov, B. R., M. A. Fortuna, D. Mouillot, I. S. Khokhlova, G. I. Shenbrot, and R.  
840 Poulin. 2012. Phylogenetic signal in module composition and species connectivity in  
841 compartmentalized host–parasite networks. *American Naturalist* 179:501–511.

- 842 Lajoie, G., and S. W. Kembel. 2021. Plant-bacteria associations are phylogenetically  
843 structured in the phyllosphere. *Molecular Ecology* 30:5572–5587.
- 844 Li, D., R. Dinnage, L. A. Nell, M. R. Helmus, and A. R. Ives. 2020. *phyr*: An r package  
845 for phylogenetic species-distribution modelling in ecological communities. (S. Price,  
846 ed.) *Methods in Ecology and Evolution* 11:1455–1463.
- 847 Losos, J. B. 2008. Phylogenetic niche conservatism, phylogenetic signal and the  
848 relationship between phylogenetic relatedness and ecological similarity among  
849 species. *Ecology Letters* 11:995–1003.
- 850 Lozupone, C., M. E. Lladser, D. Knights, J. Stombaugh, and R. Knight. 2011. UniFrac:  
851 an effective distance metric for microbial community comparison. *The ISME Journal*  
852 5:169–172.
- 853 Maliet, O., N. Loeuille, and H. Morlon. 2020. An individual based model for the eco-  
854 evolutionary emergence of bipartite interaction networks. (T. Poisot, ed.) *Ecology*  
855 *Letters* ele.13592.
- 856 Mantel, N. 1967. The detection of disease clustering and a generalized regression  
857 approach. *Cancer Research* 27:209–220.
- 858 Martín González, A. M., B. Dalsgaard, D. Nogués-Bravo, C. H. Graham, M.  
859 Schleuning, P. K. Maruyama, S. Abrahamczyk, et al. 2015. The macroecology of  
860 phylogenetically structured hummingbird-plant networks. *Global Ecology and*  
861 *Biogeography* 24:1212–1224.
- 862 Martos, F., F. Munoz, T. Pailler, I. Kottke, C. Gonneau, and M.-A. A. Selosse. 2012.  
863 The role of epiphytism in architecture and evolutionary constraint within  
864 mycorrhizal networks of tropical orchids. *Molecular Ecology* 21:5098–5109.
- 865 Morlon, H., E. Lewitus, F. L. Condamine, M. Manceau, J. Clavel, and J. Drury. 2016.  
866 RPANDA: An R package for macroevolutionary analyses on phylogenetic trees.  
867 *Methods in Ecology and Evolution* 7:589–597.
- 868 Münkemüller, T., S. Lavergne, B. Bzeznik, S. Dray, T. Jombart, K. Schiffers, and W.  
869 Thuiller. 2012. How to measure and test phylogenetic signal. *Methods in Ecology*  
870 *and Evolution* 3:743–756.

- 871 Pagel, M. 1999. Inferring the historical patterns of biological evolution. *Nature*  
872 401:877–884.
- 873 Paradis, E. 2013. Molecular dating of phylogenies by likelihood methods: A  
874 comparison of models and a new information criterion. *Molecular Phylogenetics and*  
875 *Evolution* 67:436–444.
- 876 Paradis, E., J. Claude, and K. Strimmer. 2004. APE: Analyses of phylogenetics and  
877 evolution in R language. *Bioinformatics* 20:289–290.
- 878 Peralta, G. 2016. Merging evolutionary history into species interaction networks.  
879 *Functional Ecology* 30:1917–1925.
- 880 Perez-Lamarque, B., and H. Morlon. 2019. Characterizing symbiont inheritance  
881 during host–microbiota evolution: Application to the great apes gut microbiota.  
882 *Molecular Ecology Resources* 19:1659–1671.
- 883 R Core Team. 2020. R: A language and environment for statistical computing. R  
884 Foundation for Statistical Computing, Vienna, Austria.
- 885 Rafferty, N. E., and A. R. Ives. 2013. Phylogenetic trait-based analyses of ecological  
886 networks. *Ecology* 94:2321–2333.
- 887 Revell, L. J. 2012. phytools: An R package for phylogenetic comparative biology (and  
888 other things). *Methods in Ecology and Evolution* 3:217–223.
- 889 Rezende, E. L., J. E. Lavabre, P. R. Guimarães, P. Jordano, and J. Bascompte. 2007.  
890 Non-random coextinctions in phylogenetically structured mutualistic networks.  
891 *Nature* 448:925–928.
- 892 Rohr, R. P., and J. Bascompte. 2014. Components of phylogenetic signal in  
893 antagonistic and mutualistic networks. *The American Naturalist* 184:556–564.
- 894 Sanders, J. G., S. Powell, D. J. C. Kronauer, H. L. Vasconcelos, M. E. Frederickson,  
895 and N. E. Pierce. 2014. Stability and phylogenetic correlation in gut microbiota:  
896 lessons from ants and apes. *Molecular Ecology* 23:1268–1283.
- 897 Song, S. J., J. G. Sanders, F. Delsuc, J. Metcalf, K. Amato, M. W. Taylor, F. Mazel, et al.  
898 2020. Comparative analyses of vertebrate gut microbiomes reveal convergence  
899 between birds and bats. *mBio* 11:1–14.

900 Vázquez, D. P., N. P. Chacoff, and L. Cagnolo. 2009. Evaluating multiple  
901 determinants of the structure of plant–animal mutualistic networks. *Ecology*  
902 90:2039–2046.

903 Xing, X., H. Jacquemyn, X. Gai, Y. Gao, Q. Liu, Z. Zhao, and S. Guo. 2019. The impact  
904 of life form on the architecture of orchid mycorrhizal networks in tropical forest.  
905 *Oikos* 128:1254–1264.

906 Xing, X., Q. Liu, Y. Gao, S. Shao, L. Guo, H. Jacquemyn, Z. Zhao, et al. 2020. The  
907 architecture of the network of orchid–fungus interactions in nine co-occurring  
908 *Dendrobium* species. *Frontiers in Ecology and Evolution* 8:1–10.

909
